# Supplementary material for: Intron retention as an excellent marker for diagnosing depression and for discovering new potential pathways for drug intervention
Source: Front Psychiatry. 2024 Sep 19;15:1450708. doi: 10.3389/fpsyt.2024.1450708 (PMC11446786; doi:10.3389/fpsyt.2024.1450708)
Supplement: Supplementary file 7 [file Table2.xlsx]

## Sheet: Sheet1
Supplementary table 2. Table of loci with significant differences in intron ratios between CON and BMT
ensembl ID	geneSymbol	chr	strand	riExonStart_0base	riExonEnd	upstreamES	upstreamEE	downstreamES	downstreamEE	locus	PValue	FDR	IncLevelDifference	change(CON-BMT)
ENSG00000143994	ABHD1	chr2	+	27128944	27129361	27128944	27129127	27129315	27129361	ABHD1,chr2:27129128-27129314	0.00859727	0.116573	-0.079	IncIR
ENSG00000072110	ACTN1	chr14	-	68877081	68878523	68877081	68877240	68878457	68878523	ACTN1,chr14:68877241-68878456	0.0170993	0.182006	-0.136	IncIR
ENSG00000129467	ADCY4	chr14	-	24326078	24326342	24326078	24326165	24326298	24326342	ADCY4,chr14:24326166-24326297	0.00260669	0.0535988	-0.058	IncIR
ENSG00000121753	ADGRB2	chr1	-	31735182	31735665	31735182	31735281	31735579	31735665	ADGRB2,chr1:31735282-31735578	0.000620939	0.0208399	-0.354	IncIR
ENSG00000120697	ALG5	chr13	-	36993603	36995596	36993603	36993672	36995424	36995596	ALG5,chr13:36993673-36995423	0.000623594	0.0208429	-0.079	IncIR
ENSG00000145020	AMT	chr3	-	49422103	49422451	49422103	49422271	49422360	49422451	AMT,chr3:49422272-49422359	0.00994291	0.127577	-0.059	IncIR
ENSG00000291140	AMZ2P1	chr17	-	64972753	64973517	64972753	64972927	64973231	64973517	AMZ2P1,chr17:64972928-64973230	0.00732118	0.105805	-0.086	IncIR
ENSG00000126522	ASL	chr7	+	66075833	66076093	66075833	66075856	66076038	66076093	ASL,chr7:66075857-66076037	0.0410332	0.301733	-0.059	IncIR
ENSG00000130734	ATG4D	chr19	+	10546838	10547253	10546838	10547071	10547188	10547253	ATG4D,chr19:10547072-10547187	0.0182801	0.18768	-0.072	IncIR
ENSG00000162650	ATXN7L2	chr1	+	109490921	109492104	109490921	109491717	109492026	109492104	ATXN7L2,chr1:109491718-109492025	0.000388469	0.0152422	-0.158	IncIR
ENSG00000128298	BAIAP2L2	chr22	-	38089095	38089674	38089095	38089231	38089521	38089674	BAIAP2L2,chr22:38089232-38089520	0.0203906	0.19859	-0.163	IncIR
ENSG00000125124	BBS2	chr16	-	56498436	56499907	56498436	56498568	56499777	56499907	BBS2,chr16:56498569-56499776	0.00105155	0.0302861	-0.054	IncIR
ENSG00000185963	BICD2	chr9	-	92711362	92715463	92711362	92713461	92715252	92715463	BICD2,chr9:92713462-92715251	0.000159922	0.00877627	-0.072	IncIR
ENSG00000137274	BPHL	chr6	+	3138040	3140509	3138040	3138179	3140385	3140509	BPHL,chr6:3138180-3140384	0.00127473	0.0341655	-0.11	IncIR
ENSG00000028310	BRD9	chr5	-	868606	869119	868606	868804	869037	869119	BRD9,chr5:868805-869036	7.65341e-08	2.70265e-05	-0.139	IncIR
ENSG00000156983	BRPF1	chr3	+	9742024	9742541	9742024	9742153	9742351	9742541	BRPF1,chr3:9742154-9742350	0.0039413	0.0708213	-0.154	IncIR
ENSG00000159403	C1R	chr12	-	7088838	7089489	7088838	7088986	7089292	7089489	C1R,chr12:7088987-7089291	0.00192133	0.044207	-0.088	IncIR
ENSG00000182326	C1S	chr12	+	7065816	7066633	7065816	7065970	7066517	7066633	C1S,chr12:7065971-7066516	0.0140093	0.159808	-0.332	IncIR
ENSG00000160298	C21orf58	chr21	-	46301129	46302154	46301129	46301713	46301996	46302154	C21orf58,chr21:46301714-46301995	3.06669e-08	1.31093e-05	-0.222	IncIR
ENSG00000160014	CALM3	chr19	+	46605826	46608340	46605826	46605857	46608198	46608340	CALM3,chr19:46605858-46608197	1.36966e-09	1.11244e-06	-0.114	IncIR
ENSG00000105483	CARD8	chr19	-	48232452	48234543	48232452	48232493	48234402	48234543	CARD8,chr19:48232494-48234401	0.0482243	0.329141	-0.051	IncIR
ENSG00000213213	CCDC183	chr9	+	136806077	136806672	136806077	136806238	136806503	136806672	CCDC183,chr9:136806239-136806502	0.001942	0.0444307	-0.08	IncIR
ENSG00000162004	CCDC78	chr16	-	724910	725145	724910	724989	725077	725145	CCDC78,chr16:724990-725076	0.00207413	0.0467946	-0.16	IncIR
ENSG00000204536	CCHCR1	chr6	-	31156730	31157089	31156730	31156836	31157022	31157089	CCHCR1,chr6:31156837-31157021	1.87845e-07	4.62326e-05	-0.054	IncIR
ENSG00000111665	CDCA3	chr12	-	6850466	6851009	6850466	6850596	6850832	6851009	CDCA3,chr12:6850597-6850831	1.69079e-06	0.000326967	-0.134	IncIR
ENSG00000186073	CDIN1	chr15	+	36808323	36810244	36808323	36808489	36808903	36810244	CDIN1,chr15:36808490-36808902	0.000105796	0.00660981	-0.165	IncIR
ENSG00000156345	CDK20	chr9	-	87970567	87970897	87970567	87970630	87970775	87970897	CDK20,chr9:87970631-87970774	7.29342e-06	0.000955438	-0.125	IncIR
ENSG00000143126	CELSR2	chr1	+	109271385	109271722	109271385	109271512	109271599	109271722	CELSR2,chr1:109271513-109271598	0.0137531	0.158219	-0.088	IncIR
ENSG00000102901	CENPT	chr16	-	67832011	67832545	67832011	67832136	67832227	67832545	CENPT,chr16:67832137-67832226	8.51745e-05	0.00601554	-0.202	IncIR
ENSG00000113163	CERT1	chr5	-	75400204	75403058	75400204	75400291	75402971	75403058	CERT1,chr5:75400292-75402970	0.0499815	0.337448	-0.117	IncIR
ENSG00000196118	CFAP119	chr16	-	30759341	30759724	30759341	30759458	30759653	30759724	CFAP119,chr16:30759459-30759652	0.0233527	0.218013	-0.137	IncIR
ENSG00000111642	CHD4	chr12	-	6578028	6578546	6578028	6578117	6578408	6578546	CHD4,chr12:6578118-6578407	0.0234997	0.219133	-0.053	IncIR
ENSG00000071894	CPSF1	chr8	-	144393882	144394160	144393882	144394038	144394112	144394160	CPSF1,chr8:144394039-144394111	0.000264509	0.0121041	-0.061	IncIR
ENSG00000071894	CPSF1	chr8	-	144394233	144394555	144394233	144394300	144394378	144394555	CPSF1,chr8:144394301-144394377	0.000213269	0.0106766	-0.052	IncIR
ENSG00000143578	CREB3L4	chr1	+	153972743	153973078	153972743	153972836	153972971	153973078	CREB3L4,chr1:153972837-153972970	0.0297997	0.250189	-0.079	IncIR
ENSG00000103811	CTSH	chr15	-	78931450	78932458	78931450	78932038	78932371	78932458	CTSH,chr15:78932039-78932370	0.0238041	0.220201	-0.106	IncIR
ENSG00000135047	CTSL	chr9	+	87728584	87729735	87728584	87729085	87729572	87729735	CTSL,chr9:87729086-87729571	0.0155229	0.171068	-0.053	IncIR
ENSG00000101160	CTSZ	chr20	-	58995184	58997753	58995184	58995759	58997602	58997753	CTSZ,chr20:58995760-58997601	0.0100902	0.128453	-0.051	IncIR
ENSG00000081041	CXCL2	chr4	-	74098798	74099195	74098798	74098922	74099020	74099195	CXCL2,chr4:74098923-74099019	8.49879e-05	0.00601554	-0.167	IncIR
ENSG00000100243	CYB5R3	chr22	-	42636584	42636846	42636584	42636598	42636714	42636846	CYB5R3,chr22:42636599-42636713	0.0384646	0.290613	-0.164	IncIR
ENSG00000185163	DDX51	chr12	-	132141497	132141956	132141497	132141606	132141849	132141956	DDX51,chr12:132141607-132141848	0.00532502	0.0858131	-0.08	IncIR
ENSG00000242612	DECR2	chr16	+	406345	406833	406345	406397	406735	406833	DECR2,chr16:406398-406734	0.00140613	0.0364876	-0.125	IncIR
ENSG00000184014	DENND5A	chr11	-	9141939	9143485	9141939	9142108	9143402	9143485	DENND5A,chr11:9142109-9143401	9.7312e-05	0.00637393	-0.065	IncIR
ENSG00000007923	DNAJC11	chr1	-	6637446	6638364	6637446	6637504	6638082	6638364	DNAJC11,chr1:6637505-6638081	0.00286528	0.0573812	-0.061	IncIR
ENSG00000084623	EIF3I	chr1	+	32224409	32226530	32224409	32224475	32226402	32226530	EIF3I,chr1:32224476-32226401	0.00380306	0.0691016	-0.209	IncIR
ENSG00000163378	EOGT	chr3	-	68988505	68989017	68988505	68988577	68988924	68989017	EOGT,chr3:68988578-68988923	4.63163e-05	0.00391855	-0.084	IncIR
ENSG00000103876	FAH	chr15	+	80152793	80153135	80152793	80152841	80153025	80153135	FAH,chr15:80152842-80153024	0.000148243	0.00833223	-0.288	IncIR
ENSG00000170074	FAM153A	chr5	-	177718448	177722569	177718448	177718603	177721906	177722569	FAM153A,chr5:177718604-177721905	3.97256e-09	2.15101e-06	-0.306	IncIR
ENSG00000289731	FAM153B	chr5	+	176115592	176119699	176115592	176116252	176119584	176119699	FAM153B,chr5:176116253-176119583	0.044705	0.316836	-0.051	IncIR
ENSG00000221829	FANCG	chr9	-	35074370	35075325	35074370	35074462	35075278	35075325	FANCG,chr9:35074463-35075277	0.00229882	0.049657	-0.055	IncIR
ENSG00000221829	FANCG	chr9	-	35077263	35078736	35077263	35078343	35078604	35078736	FANCG,chr9:35078344-35078603	0.00163517	0.0396444	-0.071	IncIR
ENSG00000026103	FAS	chr10	+	89010538	89013367	89010538	89012335	89013342	89013367	FAS,chr10:89012336-89013341	0.000184722	0.00974231	-0.082	IncIR
ENSG00000112367	FIG4	chr6	+	109786301	109789677	109786301	109788956	109789593	109789677	FIG4,chr6:109788957-109789592	0.000637118	0.0210353	-0.105	IncIR
ENSG00000100350	FOXRED2	chr22	-	36505895	36507040	36505895	36506423	36507008	36507040	FOXRED2,chr22:36506424-36507007	0.0192997	0.192807	-0.101	IncIR
ENSG00000145907	G3BP1	chr5	+	151799888	151800346	151799888	151800043	151800217	151800346	G3BP1,chr5:151800044-151800216	0.0114713	0.140635	-0.207	IncIR
ENSG00000117308	GALE	chr1	-	23796508	23796782	23796508	23796586	23796696	23796782	GALE,chr1:23796587-23796695	0.00764521	0.108747	-0.059	IncIR
ENSG00000291137	GBAP1	chr1	-	155216383	155217029	155216383	155216621	155216856	155217029	GBAP1,chr1:155216622-155216855	0.0282818	0.24549	-0.055	IncIR
ENSG00000291137	GBAP1	chr1	-	155217239	155218479	155217239	155217373	155217518	155218479	GBAP1,chr1:155217374-155217517	0.0284118	0.244854	-0.125	IncIR
ENSG00000107862	GBF1	chr10	+	102362474	102363396	102362474	102362628	102363255	102363396	GBF1,chr10:102362629-102363254	0.00155196	0.176026	-0.121	IncIR
ENSG00000107862	GBF1	chr10	+	102376559	102377128	102376559	102376784	102376934	102377128	GBF1,chr10:102376785-102376933	0.01617	0.0384299	-0.059	IncIR
ENSG00000117226	GBP3	chr1	-	89013184	89014279	89013184	89013427	89014082	89014279	GBP3,chr1:89013428-89014081	0.0197984	0.196114	-0.088	IncIR
ENSG00000239857	GET4	chr7	+	893739	893971	893739	893815	893898	893971	GET4,chr7:893816-893897	0.0126219	0.148705	-0.051	IncIR
ENSG00000144591	GMPPA	chr2	+	219504082	219505761	219504082	219504213	219505457	219505761	GMPPA,chr2:219504214-219505456	0.000734469	0.0232115	-0.081	IncIR
ENSG00000063660	GPC1	chr2	+	240463346	240464746	240463346	240463512	240464615	240464746	GPC1,chr2:240463513-240464614	0.00295336	0.0585053	-0.142	IncIR
ENSG00000167701	GPT	chr8	+	144504770	144505131	144504770	144504879	144504997	144505131	GPT,chr8:144504880-144504996	0.01648	0.177051	-0.063	IncIR
ENSG00000186088	GSAP	chr7	-	77329332	77330367	77329332	77329391	77330238	77330367	GSAP,chr7:77329392-77330237	0.000578444	0.0200774	-0.07	IncIR
ENSG00000138796	HADH	chr4	+	108027687	108028069	108027687	108027760	108027938	108028069	HADH,chr4:108027761-108027937	0.0110513	0.137036	-0.14	IncIR
ENSG00000213614	HEXA	chr15	-	72353067	72355624	72353067	72353178	72355558	72355624	HEXA,chr15:72353179-72355557	0.0418639	0.304912	-0.053	IncIR
ENSG00000196126	HLA-DRB1	chr6	-	32580246	32580856	32580246	32580270	32580745	32580856	HLA-DRB1,chr6:32580271-32580744	3.44284e-09	1.99734e-06	-0.16	IncIR
ENSG00000056736	IL17RB	chr3	+	53857615	53858818	53857615	53857690	53858718	53858818	IL17RB,chr3:53857691-53858717	0.000105456	0.00660981	-0.076	IncIR
ENSG00000136718	IMP4	chr2	+	130342893	130343194	130342893	130342962	130343085	130343194	IMP4,chr2:130342963-130343084	0.000139477	0.00797771	-0.089	IncIR
ENSG00000119509	INVS	chr9	+	100292325	100293043	100292325	100292436	100292946	100293043	INVS,chr9:100292437-100292945	0.0340336	0.270912	-0.059	IncIR
ENSG00000101384	JAG1	chr20	-	10648548	10649107	10648548	10648722	10649060	10649107	JAG1,chr20:10648723-10649059	0.00233473	0.0497709	-0.1	IncIR
ENSG00000225470	JPX	chrX	+	73998767	74000496	73998767	73998844	73998953	74000496	JPX,chrX:73998845-73998952	0.0368806	0.283123	-0.052	IncIR
ENSG00000183960	KCNH8	chr3	+	19450105	19451404	19450105	19450305	19451154	19451404	KCNH8,chr3:19450306-19451153	0.00128306	0.0341655	-0.1	IncIR
ENSG00000173338	KCNK7	chr11	-	65592854	65593874	65592854	65593383	65593475	65593874	KCNK7,chr11:65593384-65593474	0.000169239	0.00910306	-0.14	IncIR
ENSG00000115548	KDM3A	chr2	+	86478607	86480362	86478607	86478735	86480166	86480362	KDM3A,chr2:86478736-86480165	0.0242184	0.221511	-0.055	IncIR
ENSG00000155980	KIF5A	chr12	+	57577712	57578080	57577712	57577773	57578008	57578080	KIF5A,chr12:57577774-57578007	0.0212759	0.205718	-0.188	IncIR
ENSG00000185513	L3MBTL1	chr20	+	43530283	43530889	43530283	43530419	43530797	43530889	L3MBTL1,chr20:43530420-43530796	0.0196152	0.194761	-0.062	IncIR
ENSG00000185513	L3MBTL1	chr20	+	43530283	43532924	43530283	43530419	43532772	43532924	L3MBTL1,chr20:43530420-43532771	0.00435603	0.0569107	-0.135	IncIR
ENSG00000185513	L3MBTL1	chr20	+	43540752	43541189	43540752	43540815	43540933	43541189	L3MBTL1,chr20:43540816-43540932	0.00282381	0.075116	-0.096	IncIR
ENSG00000171916	LGALS9C	chr17	+	18492456	18492859	18492456	18492545	18492696	18492859	LGALS9C,chr17:18492546-18492695	0.0466783	0.324304	-0.133	IncIR
ENSG00000072163	LIMS2	chr2	-	127640269	127640988	127640269	127640318	127640895	127640988	LIMS2,chr2:127640319-127640894	0.0072701	0.105254	-0.123	IncIR
ENSG00000261824	LINC00662	chr19	-	27792999	27793893	27792999	27793232	27793531	27793893	LINC00662,chr19:27793233-27793530	0.00490467	0.0814637	-0.1	IncIR
ENSG00000228794	LINC01128	chr1	+	851926	852766	851926	852110	852670	852766	LINC01128,chr1:852111-852669	0.0359057	0.278243	-0.065	IncIR
ENSG00000226822	LINC02785	chr1	+	108071483	108072697	108071483	108071637	108072548	108072697	LINC02785,chr1:108071638-108072547	0.0119476	0.143984	-0.234	IncIR
ENSG00000271109	LINC03049	chr19	-	34860173	34860715	34860173	34860302	34860533	34860715	LINC03049,chr19:34860303-34860532	0.0269326	0.239328	-0.101	IncIR
ENSG00000176681	LRRC37A	chr17	+	46337295	46337568	46337295	46337350	46337428	46337568	LRRC37A,chr17:46337351-46337427	0.0257044	0.231329	-0.215	IncIR
ENSG00000148356	LRSAM1	chr9	+	127451514	127452084	127451514	127451669	127451928	127452084	LRSAM1,chr9:127451670-127451927	0.0197997	0.196114	-0.06	IncIR
ENSG00000161036	LRWD1	chr7	+	102465531	102466051	102465531	102465627	102465816	102466051	LRWD1,chr7:102465628-102465815	0.046717	0.324304	-0.073	IncIR
ENSG00000140400	MAN2C1	chr15	-	75359058	75359425	75359058	75359153	75359327	75359425	MAN2C1,chr15:75359154-75359326	0.0303522	0.252324	-0.07	IncIR
ENSG00000104973	MED25	chr19	+	49836225	49836979	49836225	49836406	49836846	49836979	MED25,chr19:49836407-49836845	0.00233195	0.0497709	-0.058	IncIR
ENSG00000214548	MEG3	chr14	+	100829033	100831534	100829033	100829749	100831420	100831534	MEG3,chr14:100829750-100831419	1.01518e-08	5.0607e-06	-0.131	IncIR
ENSG00000205639	MFSD2B	chr2	+	24023129	24023726	24023129	24023239	24023582	24023726	MFSD2B,chr2:24023240-24023581	0.0166661	0.178108	-0.063	IncIR
ENSG00000197530	MIB2	chr1	+	1628272	1628722	1628272	1628399	1628488	1628722	MIB2,chr1:1628400-1628487	0.0390919	0.292901	-0.066	IncIR
ENSG00000135596	MICAL1	chr6	-	109446135	109446772	109446135	109446412	109446695	109446772	MICAL1,chr6:109446413-109446694	5.92415e-13	1.60386e-09	-0.055	IncIR
ENSG00000133026	MYH10	chr17	-	8476875	8478446	8476875	8477048	8478337	8478446	MYH10,chr17:8477049-8478336	8.91253e-05	0.0060323	-0.163	IncIR
ENSG00000065534	MYLK	chr3	-	123666218	123667187	123666218	123666346	123667140	123667187	MYLK,chr3:123666347-123667139	5.20419e-05	0.00422684	-0.257	IncIR
ENSG00000291176	NA	chr2	+	96021367	96021831	96021367	96021465	96021597	96021831	NA,chr2:96021466-96021596	0.000226304	0.0110725	-0.162	IncIR
ENSG00000224848	NA	chr9	+	96687017	96687324	96687017	96687107	96687197	96687324	NA,chr9:96687108-96687196	0.00344907	0.0651473	-0.301	IncIR
ENSG00000111300	NAA25	chr12	-	112039228	112040578	112039228	112039339	112040480	112040578	NAA25,chr12:112039340-112040479	0.039594	0.2953	-0.087	IncIR
ENSG00000151503	NCAPD3	chr11	-	134156751	134157095	134156751	134156922	134157017	134157095	NCAPD3,chr11:134156923-134157016	0.00176637	0.0418314	-0.108	IncIR
ENSG00000213619	NDUFS3	chr11	+	47579268	47580622	47579268	47579338	47580524	47580622	NDUFS3,chr11:47579339-47580523	0.00158217	0.038823	-0.054	IncIR
ENSG00000167604	NFKBID	chr19	-	35896725	35897058	35896725	35896831	35896912	35897058	NFKBID,chr19:35896832-35896911	0.000544005	0.0191273	-0.141	IncIR
ENSG00000131697	NPHP4	chr1	-	5864337	5866458	5864337	5864517	5866372	5866458	NPHP4,chr1:5864518-5866371	0.00949535	0.124389	-0.15	IncIR
ENSG00000165609	NUDT5	chr10	-	12170716	12170908	12170716	12170770	12170899	12170908	NUDT5,chr10:12170771-12170898	0.0244106	0.222767	-0.071	IncIR
ENSG00000125450	NUP85	chr17	+	75234636	75235201	75234636	75234788	75235099	75235201	NUP85,chr17:75234789-75235098	0.00383594	0.0694385	-0.058	IncIR
ENSG00000179818	PCBP1-AS1	chr2	-	70049195	70051305	70049195	70050252	70051202	70051305	PCBP1-AS1,chr2:70050253-70051201	0.00288706	0.0576136	-0.133	IncIR
ENSG00000120509	PDZD11	chrX	-	70289254	70289593	70289254	70289354	70289521	70289593	PDZD11,chrX:70289355-70289520	0.036171	0.278994	-0.093	IncIR
ENSG00000290425	PI4KAP1	chr22	-	18536649	18537412	18536649	18536808	18537291	18537412	PI4KAP1,chr22:18536809-18537290	3.34868e-06	0.000543959	-0.065	IncIR
ENSG00000122512	PMS2	chr7	-	5995533	5997423	5995533	5995633	5997325	5997423	PMS2,chr7:5995634-5997324	0.0416968	0.304552	-0.052	IncIR
ENSG00000106628	POLD2	chr7	-	44117132	44117742	44117132	44117247	44117583	44117742	POLD2,chr7:44117248-44117582	0.00846367	0.115339	-0.072	IncIR
ENSG00000148606	POLR3A	chr10	-	77985169	77986159	77985169	77985340	77986072	77986159	POLR3A,chr10:77985341-77986071	9.67134e-05	0.00637393	-0.172	IncIR
ENSG00000102103	PQBP1	chrX	+	48901189	48902042	48901189	48901301	48901518	48902042	PQBP1,chrX:48901302-48901517	0.0116523	0.141889	-0.137	IncIR
ENSG00000112531	QKI	chr6	+	163563419	163570145	163563419	163563719	163564666	163570145	QKI,chr6:163563720-163564665	0.0417626	0.304758	-0.107	IncIR
ENSG00000112531	QKI	chr6	+	163563419	163570145	163563419	163563719	163565945	163570145	QKI,chr6:163563720-163565944	0.0176211	0.183957	-0.084	IncIR
ENSG00000246067	RAB30-DT	chr11	+	83072622	83073607	83072622	83072702	83073302	83073607	RAB30-DT,chr11:83072703-83073301	0.0126331	0.148705	-0.056	IncIR
ENSG00000174373	RALGAPA1	chr14	-	35688458	35690003	35688458	35688540	35689835	35690003	RALGAPA1,chr14:35688541-35689834	0.0121734	0.145865	-0.097	IncIR
ENSG00000099849	RASSF7	chr11	+	563188	563478	563188	563317	563395	563478	RASSF7,chr11:563318-563394	6.5579e-06	0.000887722	-0.054	IncIR
ENSG00000100918	REC8	chr14	+	24172898	24173198	24172898	24173041	24173125	24173198	REC8,chr14:24173042-24173124	0.000166052	0.00899114	-0.079	IncIR
ENSG00000107185	RGP1	chr9	+	35750657	35750989	35750657	35750741	35750839	35750989	RGP1,chr9:35750742-35750838	1.51867e-05	0.00171314	-0.051	IncIR
ENSG00000140983	RHOT2	chr16	+	668655	670175	668655	668699	670122	670175	RHOT2,chr16:668700-670121	0.0160841	0.175821	-0.088	IncIR
ENSG00000158286	RNF207	chr1	+	6209267	6209539	6209267	6209343	6209413	6209539	RNF207,chr1:6209344-6209412	0.035049	0.274247	-0.051	IncIR
ENSG00000131469	RPL27	chr17	+	42998418	43000102	42998418	42998471	42999932	43000102	RPL27,chr17:42998472-42999931	0.00977813	0.126866	-0.121	IncIR
ENSG00000141504	SAT2	chr17	-	7627362	7627805	7627362	7627414	7627569	7627805	SAT2,chr17:7627415-7627568	0.00174012	0.0416911	-0.068	IncIR
ENSG00000138760	SCARB2	chr4	-	76163224	76166301	76163224	76163383	76166168	76166301	SCARB2,chr4:76163384-76166167	0.028133	0.243859	-0.062	IncIR
ENSG00000100003	SEC14L2	chr22	+	30415758	30416087	30415758	30415865	30415947	30416087	SEC14L2,chr22:30415866-30415946	0.0494357	0.335436	-0.069	IncIR
ENSG00000104969	SGTA	chr19	-	2757336	2757782	2757336	2757447	2757692	2757782	SGTA,chr19:2757448-2757691	5.99741e-06	0.000839844	-0.058	IncIR
ENSG00000198677	SKIC3	chr5	-	95543183	95547151	95543183	95543323	95547060	95547151	SKIC3,chr5:95543324-95547059	0.00296762	0.0586357	-0.175	IncIR
ENSG00000288869	SMANTIS	chr2	-	69789544	69790436	69789544	69789926	69790203	69790436	SMANTIS,chr2:69789927-69790202	0.0059124	0.0914676	-0.141	IncIR
ENSG00000224078	SNHG14	chr15	+	25108997	25109403	25108997	25109099	25109197	25109403	SNHG14,chr15:25109100-25109196	0.0224799	0.212174	-0.132	IncIR
ENSG00000196756	SNHG17	chr20	-	38425934	38426503	38425934	38426052	38426418	38426503	SNHG17,chr20:38426053-38426417	0.0170677	0.181921	-0.082	IncIR
ENSG00000234912	SNHG20	chr17	+	77088748	77089271	77088748	77088949	77089152	77089271	SNHG20,chr17:77088950-77089151	6.5722e-05	0.00503201	-0.087	IncIR
ENSG00000168566	SNRNP48	chr6	+	7599672	7601524	7599672	7599680	7601335	7601524	SNRNP48,chr6:7599681-7601334	1.85206e-06	0.000349824	-0.089	IncIR
ENSG00000204271	SPIN3	chrX	-	56993786	56994949	56993786	56993888	56994722	56994949	SPIN3,chrX:56993889-56994721	0.021581	0.207869	-0.058	IncIR
ENSG00000066923	STAG3	chr7	+	100188452	100189016	100188452	100188529	100188811	100189016	STAG3,chr7:100188530-100188810	0.0107455	0.134269	-0.126	IncIR
ENSG00000066923	STAG3	chr7	+	100202171	100202590	100202171	100202340	100202453	100202590	STAG3,chr7:100202341-100202452	0.0300297	0.250339	-0.061	IncIR
ENSG00000204344	STK19	chr6	+	31979413	31980548	31979413	31979553	31980450	31980548	STK19,chr6:31979554-31980449	0.0174074	0.182665	-0.051	IncIR
ENSG00000255036	SUGT1P4-STRA6LP-CCDC180	chr9	+	97362195	97362441	97362195	97362251	97362362	97362441	SUGT1P4-STRA6LP-CCDC180,chr9:97362252-97362361	0.00222512	0.0489767	-0.175	IncIR
ENSG00000182253	SYNM	chr15	+	99129366	99135593	99129366	99131813	99132749	99135593	SYNM,chr15:99131814-99132748	0.032551	0.263803	-0.146	IncIR
ENSG00000064995	TAF11	chr6	-	34879966	34880376	34879966	34880063	34880288	34880376	TAF11,chr6:34880064-34880287	0.0298356	0.250189	-0.057	IncIR
ENSG00000099797	TECR	chr19	+	14563657	14563903	14563657	14563702	14563770	14563903	TECR,chr19:14563703-14563769	0.000282097	0.0126585	-0.069	IncIR
ENSG00000172171	TEFM	chr17	-	30898985	30900562	30898985	30899606	30900412	30900562	TEFM,chr17:30899607-30900411	0.0146677	0.16569	-0.068	IncIR
ENSG00000179029	TMEM107	chr17	-	8175756	8176026	8175756	8175875	8175958	8176026	TMEM107,chr17:8175876-8175957	0.000177434	0.00948105	-0.146	IncIR
ENSG00000206140	TMEM191C	chr22	+	21467893	21468431	21467893	21468202	21468314	21468431	TMEM191C,chr22:21468203-21468313	0.00162871	0.0396059	-0.123	IncIR
ENSG00000142046	TMEM91	chr19	+	41382771	41384083	41382771	41382921	41383560	41384083	TMEM91,chr19:41382922-41383559	0.0430375	0.30912	-0.077	IncIR
ENSG00000160949	TONSL	chr8	-	144432284	144433759	144432284	144432460	144433587	144433759	TONSL,chr8:144432461-144433586	0.0117079	0.142232	-0.067	IncIR
ENSG00000082512	TRAF5	chr1	+	211356366	211360779	211356366	211356468	211360701	211360779	TRAF5,chr1:211356469-211360700	0.00178717	0.0421959	-0.092	IncIR
ENSG00000182400	TRAPPC6B	chr14	-	39158284	39159550	39158284	39158402	39159449	39159550	TRAPPC6B,chr14:39158403-39159448	0.00558678	0.0875981	-0.104	IncIR
ENSG00000281103	TRG-AS1	chr7	+	38350070	38350450	38350070	38350177	38350345	38350450	TRG-AS1,chr7:38350178-38350344	0.0367919	0.28271	-0.171	IncIR
ENSG00000221926	TRIM16	chr17	-	15683035	15684299	15683035	15683157	15684195	15684299	TRIM16,chr17:15683158-15684194	0.00677125	0.0999929	-0.162	IncIR
ENSG00000235954	TTC28-AS1	chr22	+	27997410	27998838	27997410	27998152	27998603	27998838	TTC28-AS1,chr22:27998153-27998602	0.0105014	0.132316	-0.163	IncIR
ENSG00000175106	TVP23C	chr17	-	15536979	15540561	15536979	15538153	15540432	15540561	TVP23C,chr17:15538154-15540431	0.00136411	0.0356248	-0.239	IncIR
ENSG00000161265	U2AF1L4	chr19	-	35743154	35743345	35743154	35743205	35743295	35743345	U2AF1L4,chr19:35743206-35743294	0.000383992	0.0152209	-0.106	IncIR
ENSG00000083290	ULK2	chr17	-	19770829	19776407	19770829	19771067	19776308	19776407	ULK2,chr17:19771068-19776307	0.0377984	0.287279	-0.064	IncIR
ENSG00000100722	ZC3H14	chr14	+	88609266	88609803	88609266	88609403	88609678	88609803	ZC3H14,chr14:88609404-88609677	0.00278538	0.0562758	-0.079	IncIR
ENSG00000166707	ZCCHC18	chrX	+	104113433	104115842	104113433	104113573	104115251	104115842	ZCCHC18,chrX:104113574-104115250	0.0272962	0.240265	-0.097	IncIR
ENSG00000187801	ZFP69B	chr1	+	40456944	40457439	40456944	40457071	40457343	40457439	ZFP69B,chr1:40457072-40457342	0.0100286	0.12807	-0.252	IncIR
ENSG00000162300	ZFPL1	chr11	+	65084241	65084800	65084241	65084360	65084690	65084800	ZFPL1,chr11:65084361-65084689	0.000232444	0.0113048	-0.066	IncIR
ENSG00000121741	ZMYM2	chr13	+	19993062	19993919	19993062	19993564	19993825	19993919	ZMYM2,chr13:19993565-19993824	0.0413951	0.303185	-0.055	IncIR
ENSG00000130803	ZNF317	chr19	+	9156611	9157394	9156611	9156748	9157267	9157394	ZNF317,chr19:9156749-9157266	0.0136099	0.156794	-0.08	IncIR
ENSG00000188283	ZNF383	chr19	+	37235548	37236074	37235548	37235675	37235978	37236074	ZNF383,chr19:37235676-37235977	0.0244542	0.222872	-0.064	IncIR
ENSG00000160352	ZNF714	chr19	+	21116806	21125094	21116806	21118885	21124960	21125094	ZNF714,chr19:21118886-21124959	0.0152583	0.169634	-0.206	IncIR
ENSG00000198556	ZNF789	chr7	+	99478273	99482326	99478273	99478356	99479660	99482326	ZNF789,chr7:99478357-99479659	0.0405773	0.300457	-0.116	IncIR
ENSG00000197037	ZSCAN25	chr7	+	99619560	99621574	99619560	99619997	99621372	99621574	ZSCAN25,chr7:99619998-99621371	2.3149e-05	0.00248905	-0.273	IncIR
ENSG00000122952	ZWINT	chr10	-	56357437	56358459	56357437	56358185	56358376	56358459	ZWINT,chr10:56358186-56358375	0.029635	0.249954	-0.06	IncIR
ENSG00000121410	A1BG	chr19	-	58351390	58352555	58351390	58351687	58352282	58352555	A1BG,chr19:58351688-58352281	0.000354187	0.0146311	0.062	DecIR
ENSG00000114786	ABHD14A-ACY1	chr3	+	51986987	51987196	51986987	51987061	51987146	51987196	ABHD14A-ACY1,chr3:51987062-51987145	0.0180888	0.187156	0.056	DecIR
ENSG00000239900	ADSL	chr22	+	40361487	40363071	40361487	40361666	40362980	40363071	ADSL,chr22:40361667-40362979	0.0397328	0.296064	0.055	DecIR
ENSG00000018510	AGPS	chr2	+	177440964	177442486	177440964	177442235	177442406	177442486	AGPS,chr2:177442236-177442405	0.00704461	0.102917	0.081	DecIR
ENSG00000135541	AHI1	chr6	-	135492227	135497745	135492227	135492291	135497582	135497745	AHI1,chr6:135492292-135497581	0.0278272	0.242276	0.194	DecIR
ENSG00000204472	AIF1	chr6	+	31615669	31616506	31615669	31615736	31616343	31616506	AIF1,chr6:31615737-31616342	0.000209631	0.0106696	0.109	DecIR
ENSG00000003393	ALS2	chr2	-	201727211	201727775	201727211	201727278	201727704	201727775	ALS2,chr2:201727279-201727703	0.00165558	0.0399498	0.057	DecIR
ENSG00000178038	ALS2CL	chr3	-	46674565	46676402	46674565	46675976	46676244	46676402	ALS2CL,chr3:46675977-46676243	0.00402082	0.0717739	0.111	DecIR
ENSG00000161203	AP2M1	chr3	+	184180168	184180650	184180168	184180251	184180644	184180650	AP2M1,chr3:184180252-184180643	0.000291335	0.0130012	0.17	DecIR
ENSG00000161203	AP2M1	chr3	+	184180168	184180984	184180168	184180251	184180848	184180984	AP2M1,chr3:184180252-184180847	6.43829e-08	0.029802	0.063	DecIR
ENSG00000161203	AP2M1	chr3	+	184180168	184180984	184180168	184180650	184180848	184180984	AP2M1,chr3:184180651-184180847	0.00102893	2.43523e-05	0.241	DecIR
ENSG00000159314	ARHGAP27	chr17	-	45404028	45404528	45404028	45404096	45404444	45404528	ARHGAP27,chr17:45404097-45404443	8.08593e-05	0.00591657	0.072	DecIR
ENSG00000068650	ATP11A	chr13	+	112857817	112859452	112857817	112857920	112859392	112859452	ATP11A,chr13:112857921-112859391	1.35005e-07	4.06116e-05	0.138	DecIR
ENSG00000260442	ATP2A1-AS1	chr16	-	28878956	28879755	28878956	28879107	28879541	28879755	ATP2A1-AS1,chr16:28879108-28879540	2.25433e-06	0.000398036	0.199	DecIR
ENSG00000162650	ATXN7L2	chr1	+	109488846	109490128	109488846	109489100	109489929	109490128	ATXN7L2,chr1:109489101-109489928	0.0114279	0.140632	0.099	DecIR
ENSG00000163930	BAP1	chr3	-	52402778	52403298	52402778	52402940	52403137	52403298	BAP1,chr3:52402941-52403136	0.00651216	0.0976032	0.089	DecIR
ENSG00000174483	BBS1	chr11	+	66531655	66532219	66531655	66531742	66531950	66532219	BBS1,chr11:66531743-66531949	0.0468407	0.324357	0.081	DecIR
ENSG00000103507	BCKDK	chr16	+	31110400	31111219	31110400	31110499	31111090	31111219	BCKDK,chr16:31110500-31111089	0.00128145	0.0341655	0.205	DecIR
ENSG00000164039	BDH2	chr4	-	103085348	103086540	103085348	103085462	103085698	103086540	BDH2,chr4:103085463-103085697	0.0275686	0.240765	0.06	DecIR
ENSG00000132640	BTBD3	chr20	+	11917777	11918601	11917777	11918011	11918333	11918601	BTBD3,chr20:11918012-11918332	0.0112968	0.13923	0.146	DecIR
ENSG00000111801	BTN3A3	chr6	+	26448247	26448754	26448247	26448448	26448727	26448754	BTN3A3,chr6:26448449-26448726	0.00357854	0.0668159	0.059	DecIR
ENSG00000269609	C10orf95-AS1	chr10	+	102451398	102452187	102451398	102451555	102452089	102452187	C10orf95-AS1,chr10:102451556-102452088	0.00105968	0.0303053	0.095	DecIR
ENSG00000167535	CACNB3	chr12	+	48824668	48825243	48824668	48824733	48825162	48825243	CACNB3,chr12:48824734-48825161	0.000307569	0.0132488	0.186	DecIR
ENSG00000159214	CCDC24	chr1	+	43991846	43992387	43991846	43992004	43992152	43992387	CCDC24,chr1:43992005-43992151	0.00300762	0.0588625	0.061	DecIR
ENSG00000162004	CCDC78	chr16	-	725965	726456	725965	726085	726307	726456	CCDC78,chr16:726086-726306	1.80946e-07	4.62326e-05	0.087	DecIR
ENSG00000166946	CCNDBP1	chr15	+	43194080	43194461	43194080	43194137	43194414	43194461	CCNDBP1,chr15:43194138-43194413	0.00625926	0.0952205	0.106	DecIR
ENSG00000177575	CD163	chr12	-	7479859	7481256	7479859	7479996	7481160	7481256	CD163,chr12:7479997-7481159	0.0199916	0.196814	0.082	DecIR
ENSG00000102901	CENPT	chr16	-	67832011	67832545	67832011	67832108	67832454	67832545	CENPT,chr16:67832109-67832453	0.0222206	0.210836	0.082	DecIR
ENSG00000116198	CEP104	chr1	-	3836494	3837519	3836494	3836692	3837287	3837519	CEP104,chr1:3836693-3837286	0.0246204	0.223676	0.075	DecIR
ENSG00000156042	CFAP70	chr10	-	73293262	73297173	73293262	73293388	73297041	73297173	CFAP70,chr10:73293389-73297040	3.68821e-05	0.00329183	0.17	DecIR
ENSG00000243649	CFB	chr6	+	31951554	31952084	31951554	31951604	31951874	31952084	CFB,chr6:31951605-31951873	0.000243563	0.0117054	0.18	DecIR
ENSG00000113240	CLK4	chr5	-	178616881	178618778	178616881	178616948	178618555	178618778	CLK4,chr5:178616949-178618554	0.0110975	0.137399	0.054	DecIR
ENSG00000119397	CNTRL	chr9	+	121157739	121159019	121157739	121157880	121158854	121159019	CNTRL,chr9:121157881-121158853	0.024091	0.221086	0.068	DecIR
ENSG00000178971	CTC1	chr17	-	8228502	8229446	8228502	8228629	8229301	8229446	CTC1,chr17:8228630-8229300	2.15597e-05	0.00239874	0.053	DecIR
ENSG00000171793	CTPS1	chr1	+	41009444	41012550	41009444	41009589	41011657	41012550	CTPS1,chr1:41009590-41011656	0.040075	0.29834	0.214	DecIR
ENSG00000174080	CTSF	chr11	-	66565670	66565927	66565670	66565749	66565830	66565927	CTSF,chr11:66565750-66565829	0.00719709	0.104383	0.079	DecIR
ENSG00000166347	CYB5A	chr18	-	74255740	74260944	74255740	74255775	74260914	74260944	CYB5A,chr18:74255776-74260913	6.5963e-08	2.43523e-05	0.056	DecIR
ENSG00000215301	DDX3X	chrX	+	41343215	41344128	41343215	41343351	41344029	41344128	DDX3X,chrX:41343352-41344028	0.000333162	0.0139482	0.07	DecIR
ENSG00000108654	DDX5	chr17	-	64506754	64507562	64506754	64507314	64507477	64507562	DDX5,chr17:64507315-64507476	0.0150737	0.168172	0.061	DecIR
ENSG00000235706	DICER1-AS1	chr14	+	95157644	95159035	95157644	95158234	95158875	95159035	DICER1-AS1,chr14:95158235-95158874	2.87562e-05	0.00278045	0.071	DecIR
ENSG00000132535	DLG4	chr17	-	7193963	7194495	7193963	7194000	7194318	7194495	DLG4,chr17:7194001-7194317	0.000648256	0.0210605	0.066	DecIR
ENSG00000179532	DNHD1	chr11	+	6547862	6548402	6547862	6548040	6548209	6548402	DNHD1,chr11:6548041-6548208	0.00456192	9.80473e-08	0.067	DecIR
ENSG00000179532	DNHD1	chr11	+	6570008	6571423	6570008	6570100	6570617	6571423	DNHD1,chr11:6570101-6570616	8.45027e-11	0.078004	0.147	DecIR
ENSG00000172269	DPAGT1	chr11	-	119097141	119098043	119097141	119097297	119097854	119098043	DPAGT1,chr11:119097298-119097853	0.00117164	0.0325995	0.087	DecIR
ENSG00000145191	EIF2B5	chr3	+	184140079	184140730	184140079	184140221	184140417	184140730	EIF2B5,chr3:184140222-184140416	0.0121764	0.145865	0.106	DecIR
ENSG00000106123	EPHB6	chr7	+	142862755	142863327	142862755	142862833	142863130	142863327	EPHB6,chr7:142862834-142863129	0.012308	0.146792	0.075	DecIR
ENSG00000049167	ERCC8	chr5	-	60887439	60891086	60887439	60887520	60890888	60891086	ERCC8,chr5:60887521-60890887	5.29287e-05	0.0042563	0.073	DecIR
ENSG00000107566	ERLIN1	chr10	-	100185513	100186029	100185513	100185637	100185903	100186029	ERLIN1,chr10:100185638-100185902	0.00923311	0.122136	0.223	DecIR
ENSG00000106462	EZH2	chr7	-	148816683	148818117	148816683	148816778	148817876	148818117	EZH2,chr7:148816779-148817875	0.000768423	0.0238211	0.114	DecIR
ENSG00000131944	FAAP24	chr19	+	32973183	32973562	32973183	32973302	32973483	32973562	FAAP24,chr19:32973303-32973482	0.000259956	0.0120482	0.389	DecIR
ENSG00000182518	FAM104B	chrX	-	55143101	55146311	55143101	55143875	55146180	55146311	FAM104B,chrX:55143876-55146179	0.000474384	0.0176666	0.073	DecIR
ENSG00000159784	FAM131B	chr7	-	143359325	143359767	143359325	143359419	143359731	143359767	FAM131B,chr7:143359420-143359730	0.0053493	0.0860129	0.299	DecIR
ENSG00000234545	FAM133B	chr7	-	92577654	92578182	92577654	92577676	92578149	92578182	FAM133B,chr7:92577677-92578148	4.40981e-13	1.60386e-09	0.139	DecIR
ENSG00000221829	FANCG	chr9	-	35077263	35078343	35077263	35077399	35078140	35078343	FANCG,chr9:35077400-35078139	0.0122904	0.146792	0.097	DecIR
ENSG00000160856	FCRL3	chr1	-	157697139	157697919	157697139	157697424	157697658	157697919	FCRL3,chr1:157697425-157697657	0.00397143	0.0712052	0.091	DecIR
ENSG00000145216	FIP1L1	chr4	+	53440581	53442707	53440581	53440608	53442652	53442707	FIP1L1,chr4:53440609-53442651	0.0270989	0.240019	0.052	DecIR
ENSG00000102081	FMR1	chrX	+	147943130	147945051	147943130	147943326	147944868	147945051	FMR1,chrX:147943327-147944867	0.00403787	0.0719201	0.068	DecIR
ENSG00000110074	FOXRED1	chr11	+	126274926	126275870	126274926	126275021	126275793	126275870	FOXRED1,chr11:126275022-126275792	0.0149743	0.167765	0.082	DecIR
ENSG00000139112	GABARAPL1	chr12	+	10213835	10214187	10213835	10213974	10214073	10214187	GABARAPL1,chr12:10213975-10214072	0.00208644	0.0469419	0.069	DecIR
ENSG00000106105	GARS1	chr7	+	30628559	30632437	30628559	30628669	30632246	30632437	GARS1,chr7:30628670-30632245	0.0184493	0.188324	0.189	DecIR
ENSG00000291137	GBAP1	chr1	-	155217239	155218479	155217239	155218049	155218387	155218479	GBAP1,chr1:155218050-155218386	0.0182046	0.187637	0.15	DecIR
ENSG00000107862	GBF1	chr10	+	102379520	102379954	102379520	102379729	102379852	102379954	GBF1,chr10:102379730-102379851	0.000882906	0.0264611	0.083	DecIR
ENSG00000182093	GET1	chr21	+	39405913	39406731	39405913	39406058	39406561	39406731	GET1,chr21:39406059-39406560	1.74827e-09	1.18329e-06	0.258	DecIR
ENSG00000215252	GOLGA8B	chr15	-	34532845	34534173	34532845	34532962	34534053	34534173	GOLGA8B,chr15:34532963-34534052	0.0472354	0.3254	0.122	DecIR
ENSG00000197858	GPAA1	chr8	+	144083388	144083861	144083388	144083500	144083713	144083861	GPAA1,chr8:144083501-144083712	0.00983794	0.127074	0.055	DecIR
ENSG00000138678	GPAT3	chr4	+	83536107	83536763	83536107	83536206	83536503	83536763	GPAT3,chr4:83536207-83536502	0.0194531	0.19364	0.171	DecIR
ENSG00000103253	HAGHL	chr16	+	727105	727614	727105	727175	727411	727614	HAGHL,chr16:727176-727410	0.000354878	0.0146311	0.084	DecIR
ENSG00000231074	HCG18	chr6	-	30291536	30294964	30291536	30292599	30294470	30294964	HCG18,chr6:30292600-30294469	0.00289628	0.0576559	0.08	DecIR
ENSG00000206503	HLA-A	chr6	+	29942756	29943543	29942756	29943026	29943267	29943543	HLA-A,chr6:29943027-29943266	0.000384177	0.0152209	0.313	DecIR
ENSG00000105707	HPN	chr19	+	35065867	35066558	35065867	35066032	35066248	35066558	HPN,chr19:35066033-35066247	0.000197308	0.0102727	0.181	DecIR
ENSG00000100099	HPS4	chr22	-	26465454	26466262	26465454	26465551	26466225	26466262	HPS4,chr22:26465552-26466224	0.016203	0.176026	0.07	DecIR
ENSG00000115317	HTRA2	chr2	+	74531338	74531702	74531338	74531411	74531596	74531702	HTRA2,chr2:74531412-74531595	0.0326749	0.263803	0.055	DecIR
ENSG00000196305	IARS1	chr9	-	92285721	92287910	92285721	92285839	92287790	92287910	IARS1,chr9:92285840-92287789	9.73435e-08	3.16249e-05	0.316	DecIR
ENSG00000159110	IFNAR2	chr21	+	33244950	33246482	33244950	33245074	33246256	33246482	IFNAR2,chr21:33245075-33246255	0.0163276	0.176582	0.217	DecIR
ENSG00000187535	IFT140	chr16	-	1525886	1526796	1525886	1526077	1526732	1526796	IFT140,chr16:1526078-1526731	0.0019036	0.0439233	0.073	DecIR
ENSG00000138002	IFT172	chr2	-	27453981	27454418	27453981	27454162	27454353	27454418	IFT172,chr2:27454163-27454352	0.0497125	0.336471	0.07	DecIR
ENSG00000100360	IFT27	chr22	-	36758210	36764036	36758210	36758409	36763918	36764036	IFT27,chr22:36758410-36763917	0.000149628	0.00833223	0.059	DecIR
ENSG00000163702	IL17RC	chr3	+	9923880	9924291	9923880	9924137	9924231	9924291	IL17RC,chr3:9924138-9924230	0.00795505	0.111015	0.126	DecIR
ENSG00000132323	ILKAP	chr2	-	238194274	238194870	238194274	238194331	238194781	238194870	ILKAP,chr2:238194332-238194780	0.00488455	0.0812956	0.112	DecIR
ENSG00000111653	ING4	chr12	-	6652661	6653050	6652661	6652770	6652944	6653050	ING4,chr12:6652771-6652943	0.023902	0.220846	0.057	DecIR
ENSG00000118308	IRAG2	chr12	+	25079397	25079763	25079397	25079462	25079701	25079763	IRAG2,chr12:25079463-25079700	0.000360968	0.0147326	0.1	DecIR
ENSG00000005884	ITGA3	chr17	+	50075458	50075735	50075458	50075526	50075598	50075735	ITGA3,chr17:50075527-50075597	0.0119048	0.143984	0.151	DecIR
ENSG00000005844	ITGAL	chr16	+	30473964	30474298	30473964	30474083	30474195	30474298	ITGAL,chr16:30474084-30474194	0.0201525	0.197203	0.059	DecIR
ENSG00000132470	ITGB4	chr17	+	75757199	75757818	75757199	75757310	75757415	75757818	ITGB4,chr17:75757311-75757414	0.0162296	0.176026	0.1	DecIR
ENSG00000160593	JAML	chr11	-	118196734	118198091	118196734	118196821	118197967	118198091	JAML,chr11:118196822-118197966	0.000292992	0.0130037	0.052	DecIR
ENSG00000156650	KAT6B	chr10	+	74975398	74977437	74975398	74976330	74977315	74977437	KAT6B,chr10:74976331-74977314	0.0200501	0.197082	0.388	DecIR
ENSG00000110066	KMT5B	chr11	-	68179469	68180200	68179469	68179616	68180131	68180200	KMT5B,chr11:68179617-68180130	0.000199346	0.0103127	0.054	DecIR
ENSG00000203896	LIME1	chr20	+	63737820	63738060	63737820	63737902	63737972	63738060	LIME1,chr20:63737903-63737971	0.002481	0.0516684	0.057	DecIR
ENSG00000203896	LIME1	chr20	+	63737820	63738060	63737820	63737902	63738007	63738060	LIME1,chr20:63737903-63738006	7.81617e-05	0.00579559	0.064	DecIR
ENSG00000267796	LIN37	chr19	+	35752433	35752999	35752433	35752484	35752913	35752999	LIN37,chr19:35752485-35752912	0.00750226	0.107656	0.051	DecIR
ENSG00000228784	LINC00954	chr2	+	19881566	19882260	19881566	19881618	19881705	19882260	LINC00954,chr2:19881619-19881704	0.000741432	0.0233407	0.058	DecIR
ENSG00000251442	LINC01094	chr4	+	78680760	78682683	78680760	78681664	78682085	78682683	LINC01094,chr4:78681665-78682084	0.0375733	0.286341	0.154	DecIR
ENSG00000262468	LINC01569	chr16	-	4246005	4247061	4246005	4246839	4246972	4247061	LINC01569,chr16:4246840-4246971	0.000706221	0.0226682	0.057	DecIR
ENSG00000073350	LLGL2	chr17	+	75574212	75574668	75574212	75574260	75574609	75574668	LLGL2,chr17:75574261-75574608	8.06262e-06	0.00103944	0.096	DecIR
ENSG00000238083	LRRC37A2	chr17	+	46555151	46555424	46555151	46555206	46555284	46555424	LRRC37A2,chr17:46555207-46555283	0.0470442	0.324357	0.105	DecIR
ENSG00000232859	LYRM9	chr17	-	27878357	27880366	27878357	27879490	27880273	27880366	LYRM9,chr17:27879491-27880272	0.0359424	0.278243	0.067	DecIR
ENSG00000140400	MAN2C1	chr15	-	75358461	75358808	75358461	75358618	75358703	75358808	MAN2C1,chr15:75358619-75358702	0.0171962	0.182096	0.184	DecIR
ENSG00000139625	MAP3K12	chr12	-	53484256	53485214	53484256	53484365	53485055	53485214	MAP3K12,chr12:53484366-53485054	0.00681947	0.100522	0.058	DecIR
ENSG00000075413	MARK3	chr14	+	103490951	103492034	103490951	103491107	103491776	103492034	MARK3,chr14:103491108-103491775	0.0361695	0.278994	0.09	DecIR
ENSG00000038274	MAT2B	chr5	+	163512001	163513994	163512001	163512196	163513841	163513994	MAT2B,chr5:163512197-163513840	0.0065629	0.0978053	0.079	DecIR
ENSG00000165792	METTL17	chr14	+	20994793	20995233	20994793	20994901	20995164	20995233	METTL17,chr14:20994902-20995163	0.00324482	0.0623036	0.076	DecIR
ENSG00000116688	MFN2	chr1	+	11981809	11982114	11981809	11981853	11981969	11982114	MFN2,chr1:11981854-11981968	2.47554e-05	0.00248905	0.25	DecIR
ENSG00000156030	MIDEAS	chr14	-	73715121	73719501	73715121	73719008	73719304	73719501	MIDEAS,chr14:73719009-73719303	0.0453802	0.320224	0.051	DecIR
ENSG00000141503	MINK1	chr17	+	4890221	4890735	4890221	4890308	4890516	4890735	MINK1,chr17:4890309-4890515	0.0199065	0.196352	0.06	DecIR
ENSG00000080823	MOK	chr14	-	102232534	102233789	102232534	102232671	102233687	102233789	MOK,chr14:102232672-102233686	2.04545e-09	1.27794e-06	0.198	DecIR
ENSG00000204410	MSH5	chr6	+	31743903	31744299	31743903	31744025	31744138	31744299	MSH5,chr6:31744026-31744137	1.53944e-07	4.28338e-05	0.087	DecIR
ENSG00000005302	MSL3	chrX	+	11759633	11759875	11759633	11759712	11759792	11759875	MSL3,chrX:11759713-11759791	6.50058e-06	0.000887722	0.054	DecIR
ENSG00000242086	MUC20-OT1	chr3	+	195708133	195708807	195708133	195708268	195708746	195708807	MUC20-OT1,chr3:195708269-195708745	0.00525739	0.0852307	0.082	DecIR
ENSG00000136286	MYO1G	chr7	-	44972114	44975227	44972114	44972274	44975173	44975227	MYO1G,chr7:44972275-44975172	0.0302995	0.252144	0.103	DecIR
ENSG00000162601	MYSM1	chr1	-	58689037	58690249	58689037	58689116	58690225	58690249	MYSM1,chr1:58689117-58690224	0.0237044	0.21978	0.071	DecIR
ENSG00000291132	NA	chr1	-	32231656	32232184	32231656	32231969	32232041	32232184	NA,chr1:32231970-32232040	0.000951793	0.00285234	0.071	DecIR
ENSG00000284946	NA	chr15	-	90980883	90981669	90980883	90981033	90981498	90981669	NA,chr15:90981034-90981497	0.0413209	0.303169	0.137	DecIR
ENSG00000291063	NA	chr17	+	31021909	31024426	31021909	31022042	31024376	31024426	NA,chr17:31022043-31024375	0.00646895	0.0974784	0.114	DecIR
ENSG00000291006	NA	chr6	+	52666388	52669155	52666388	52666518	52666748	52669155	NA,chr6:52666519-52666747	2.98509e-05	0.0282134	0.318	DecIR
ENSG00000161048	NAPEPLD	chr7	-	103099775	103103554	103099775	103103122	103103423	103103554	NAPEPLD,chr7:103103123-103103422	0.0455244	0.320847	0.121	DecIR
ENSG00000162736	NCSTN	chr1	+	160354117	160356347	160354117	160354290	160356259	160356347	NCSTN,chr1:160354291-160356258	1.99314e-07	4.76126e-05	0.096	DecIR
ENSG00000165795	NDRG2	chr14	-	21018203	21018814	21018203	21018239	21018762	21018814	NDRG2,chr14:21018240-21018761	0.0339879	0.270903	0.16	DecIR
ENSG00000128609	NDUFA5	chr7	-	123557403	123557781	123557403	123557448	123557624	123557781	NDUFA5,chr7:123557449-123557623	0.032736	0.264034	0.143	DecIR
ENSG00000100968	NFATC4	chr14	+	24376293	24378001	24376293	24376878	24377637	24378001	NFATC4,chr14:24376879-24377636	0.000119678	0.00730844	0.382	DecIR
ENSG00000188158	NHS	chrX	+	17721440	17724430	17721440	17721633	17724298	17724430	NHS,chrX:17721634-17724297	0.000532004	0.0189979	0.14	DecIR
ENSG00000106733	NMRK1	chr9	-	75068995	75070042	75068995	75069102	75069894	75070042	NMRK1,chr9:75069103-75069893	0.00888183	0.119632	0.178	DecIR
ENSG00000142546	NOSIP	chr19	-	49557089	49558978	49557089	49558199	49558896	49558978	NOSIP,chr19:49558200-49558895	0.0297653	0.250189	0.063	DecIR
ENSG00000144061	NPHP1	chr2	-	110163047	110164730	110163047	110163132	110164687	110164730	NPHP1,chr2:110163133-110164686	0.000719457	1.10597e-05	0.255	DecIR
ENSG00000144061	NPHP1	chr2	-	110163047	110164730	110163047	110163135	110164687	110164730	NPHP1,chr2:110163136-110164686	2.45106e-08	0.0229154	0.357	DecIR
ENSG00000213024	NUP62	chr19	-	49927693	49929504	49927693	49927815	49929325	49929504	NUP62,chr19:49927816-49929324	0.0131753	0.000289254	0.058	DecIR
ENSG00000213024	NUP62	chr19	-	49927693	49929504	49927693	49927848	49929325	49929504	NUP62,chr19:49927849-49929324	1.46016e-06	0.15375	0.123	DecIR
ENSG00000111335	OAS2	chr12	+	113004474	113005222	113004474	113004673	113004933	113005222	OAS2,chr12:113004674-113004932	0.000261078	0.0120482	0.064	DecIR
ENSG00000122417	ODF2L	chr1	-	86385457	86387086	86385457	86385590	86386914	86387086	ODF2L,chr1:86385591-86386913	0.0260475	0.23325	0.081	DecIR
ENSG00000115257	PCSK4	chr19	-	1486852	1487313	1486852	1486973	1487140	1487313	PCSK4,chr19:1486974-1487139	0.00141609	0.036519	0.073	DecIR
ENSG00000013375	PGM3	chr6	-	83188613	83191014	83188613	83188794	83190808	83191014	PGM3,chr6:83188795-83190807	0.000612274	0.0207514	0.085	DecIR
ENSG00000110697	PITPNM1	chr11	-	67496177	67497436	67496177	67496345	67497230	67497436	PITPNM1,chr11:67496346-67497229	0.0163111	0.176582	0.052	DecIR
ENSG00000129219	PLD2	chr17	+	4807983	4808416	4807983	4808114	4808273	4808416	PLD2,chr17:4808115-4808272	0.00112021	0.0317015	0.097	DecIR
ENSG00000138398	PPIG	chr2	+	169630773	169631933	169630773	169630987	169631774	169631933	PPIG,chr2:169630988-169631773	0.0322684	0.262758	0.067	DecIR
ENSG00000112640	PPP2R5D	chr6	+	43008366	43009227	43008366	43008475	43009056	43009227	PPP2R5D,chr6:43008476-43009055	0.000366124	0.0148683	0.195	DecIR
ENSG00000132600	PRMT7	chr16	+	68351389	68352315	68351389	68351814	68352247	68352315	PRMT7,chr16:68351815-68352246	0.000471461	0.0176666	0.104	DecIR
ENSG00000167595	PROSER3	chr19	+	35766767	35768065	35766767	35766955	35767071	35768065	PROSER3,chr19:35766956-35767070	0.000406085	0.0158535	0.051	DecIR
ENSG00000105227	PRX	chr19	-	40393767	40398816	40393767	40397970	40398619	40398816	PRX,chr19:40397971-40398618	0.0139332	0.159613	0.133	DecIR
ENSG00000072135	PTPN18	chr2	+	130370556	130370782	130370556	130370623	130370704	130370782	PTPN18,chr2:130370624-130370703	2.42659e-05	0.00248905	0.078	DecIR
ENSG00000160953	PWWP3A	chr19	+	1357008	1358464	1357008	1357094	1358393	1358464	PWWP3A,chr19:1357095-1358392	0.0190633	0.191387	0.06	DecIR
ENSG00000100949	RABGGTA	chr14	-	24270836	24271169	24270836	24270998	24271112	24271169	RABGGTA,chr14:24270999-24271111	0.00465559	0.0786127	0.119	DecIR
ENSG00000002016	RAD52	chr12	-	926795	927263	926795	926946	927144	927263	RAD52,chr12:926947-927143	0.0279158	0.242494	0.157	DecIR
ENSG00000004534	RBM6	chr3	+	50061461	50062108	50061461	50061547	50061961	50062108	RBM6,chr3:50061548-50061960	9.04335e-05	0.00607025	0.109	DecIR
ENSG00000159496	RGL4	chr22	+	23698554	23698978	23698554	23698645	23698843	23698978	RGL4,chr22:23698646-23698842	0.0132174	0.15402	0.085	DecIR
ENSG00000099999	RNF215	chr22	-	30379481	30379780	30379481	30379622	30379710	30379780	RNF215,chr22:30379623-30379709	0.0295553	0.249954	0.071	DecIR
ENSG00000154134	ROBO3	chr11	+	124877518	124878131	124877518	124877658	124877936	124878131	ROBO3,chr11:124877659-124877935	0.0288483	0.246898	0.08	DecIR
ENSG00000164610	RP9	chr7	-	33097270	33100561	33097270	33099436	33100530	33100561	RP9,chr7:33099437-33100529	0.0100477	0.128112	0.054	DecIR
ENSG00000125691	RPL23	chr17	-	38850080	38852732	38850080	38850214	38852603	38852732	RPL23,chr17:38850215-38852602	0.00790009	0.110774	0.11	DecIR
ENSG00000175634	RPS6KB2	chr11	+	67429526	67432657	67429526	67429595	67432599	67432657	RPS6KB2,chr11:67429596-67432598	4.25831e-06	0.000665116	0.103	DecIR
ENSG00000004139	SARM1	chr17	+	28388173	28388539	28388173	28388276	28388349	28388539	SARM1,chr17:28388277-28388348	0.00810254	0.102917	0.052	DecIR
ENSG00000004139	SARM1	chr17	+	28388173	28388539	28388173	28388276	28388359	28388539	SARM1,chr17:28388277-28388358	0.0070453	0.11173	0.198	DecIR
ENSG00000100241	SBF1	chr22	-	50467337	50467693	50467337	50467448	50467540	50467693	SBF1,chr22:50467449-50467539	0.0386788	0.290642	0.067	DecIR
ENSG00000092108	SCFD1	chr14	+	30673256	30673997	30673256	30673347	30673930	30673997	SCFD1,chr14:30673348-30673929	0.00276185	0.0560133	0.121	DecIR
ENSG00000147955	SIGMAR1	chr9	-	34636996	34637420	34636996	34637112	34637219	34637420	SIGMAR1,chr9:34637113-34637218	0.00303198	0.0590545	0.078	DecIR
ENSG00000204351	SKIC2	chr6	+	31968870	31969420	31968870	31969089	31969279	31969420	SKIC2,chr6:31969090-31969278	1.19855e-05	0.00145293	0.089	DecIR
ENSG00000198677	SKIC3	chr5	-	95516524	95517060	95516524	95516586	95516671	95517060	SKIC3,chr5:95516587-95516670	1.9425e-06	0.000358567	0.06	DecIR
ENSG00000174326	SLC16A11	chr17	-	7043311	7044092	7043311	7043519	7043774	7044092	SLC16A11,chr17:7043520-7043773	0.000533306	0.0189979	0.142	DecIR
ENSG00000197375	SLC22A5	chr5	+	132384146	132385499	132384146	132384314	132385327	132385499	SLC22A5,chr5:132384315-132385326	0.0118886	0.143984	0.07	DecIR
ENSG00000185803	SLC52A2	chr8	+	144358594	144359423	144358594	144359065	144359187	144359423	SLC52A2,chr8:144359066-144359186	0.0459452	0.322251	0.101	DecIR
ENSG00000040487	SLC66A1	chr1	+	19312325	19312889	19312325	19312358	19312728	19312889	SLC66A1,chr1:19312359-19312727	0.0152211	0.169582	0.051	DecIR
ENSG00000225138	SLC9A3-AS1	chr5	+	479781	480216	479781	479997	480067	480216	SLC9A3-AS1,chr5:479998-480066	2.37021e-05	0.00248905	0.057	DecIR
ENSG00000135740	SLC9A5	chr16	+	67255392	67255930	67255392	67255471	67255838	67255930	SLC9A5,chr16:67255472-67255837	0.000468054	0.0176666	0.167	DecIR
ENSG00000108604	SMARCD2	chr17	-	63833068	63833722	63833068	63833170	63833586	63833722	SMARCD2,chr17:63833171-63833585	0.00752142	0.107741	0.059	DecIR
ENSG00000113810	SMC4	chr3	+	160412325	160412849	160412325	160412453	160412529	160412849	SMC4,chr3:160412454-160412528	8.44396e-05	0.00601554	0.104	DecIR
ENSG00000183963	SMTN	chr22	+	31096997	31097338	31096997	31097060	31097268	31097338	SMTN,chr22:31097061-31097267	0.0188044	0.190164	0.075	DecIR
ENSG00000092531	SNAP23	chr15	+	42512954	42513447	42512954	42512996	42513173	42513447	SNAP23,chr15:42512997-42513172	0.000373803	0.0150299	0.099	DecIR
ENSG00000196756	SNHG17	chr20	-	38421005	38422241	38421005	38421098	38422086	38422241	SNHG17,chr20:38421099-38422085	0.0432948	0.309815	0.064	DecIR
ENSG00000172803	SNX32	chr11	+	65849919	65850271	65849919	65850030	65850149	65850271	SNX32,chr11:65850031-65850148	5.6779e-05	0.00452117	0.178	DecIR
ENSG00000172803	SNX32	chr11	+	65849919	65850554	65849919	65850271	65850430	65850554	SNX32,chr11:65850272-65850429	0.00852481	0.115783	0.33	DecIR
ENSG00000197912	SPG7	chr16	+	89530682	89532066	89530682	89530808	89531924	89532066	SPG7,chr16:89530809-89531923	5.11938e-06	0.0179747	0.083	DecIR
ENSG00000197912	SPG7	chr16	+	89545871	89546181	89545871	89546030	89546131	89546181	SPG7,chr16:89546031-89546130	0.000486879	0.000755993	0.052	DecIR
ENSG00000197912	SPG7	chr16	+	89545871	89546760	89545871	89546181	89546657	89546760	SPG7,chr16:89546182-89546656	0.0184001	0.188219	0.062	DecIR
ENSG00000124356	STAMBP	chr2	+	73828960	73829510	73828960	73828996	73829404	73829510	STAMBP,chr2:73828997-73829403	0.00356769	0.0668159	0.138	DecIR
ENSG00000159433	STARD9	chr15	+	42663280	42663917	42663280	42663490	42663819	42663917	STARD9,chr15:42663491-42663818	0.0310901	0.257143	0.253	DecIR
ENSG00000115415	STAT1	chr2	-	190978855	190980669	190978855	190979001	190980619	190980669	STAT1,chr2:190979002-190980618	0.00609502	0.0932274	0.079	DecIR
ENSG00000247708	STX18-AS1	chr4	+	4648976	4649542	4648976	4649109	4649369	4649542	STX18-AS1,chr4:4649110-4649368	0.0321692	0.262328	0.095	DecIR
ENSG00000197165	SULT1A2	chr16	-	28595366	28595675	28595366	28595464	28595549	28595675	SULT1A2,chr16:28595465-28595548	0.00025315	0.0120174	0.144	DecIR
ENSG00000198198	SZT2	chr1	+	43446178	43447168	43446178	43446259	43446954	43447168	SZT2,chr1:43446260-43446953	0.00155098	0.0384299	0.052	DecIR
ENSG00000162062	TEDC2	chr16	+	2460144	2460693	2460144	2460381	2460622	2460693	TEDC2,chr16:2460382-2460621	2.37605e-05	0.00248905	0.293	DecIR
ENSG00000072274	TFRC	chr3	-	196062581	196062939	196062581	196062645	196062853	196062939	TFRC,chr3:196062646-196062852	0.0383174	0.289771	0.052	DecIR
ENSG00000065717	TLE2	chr19	-	3019282	3019773	3019282	3019466	3019698	3019773	TLE2,chr19:3019467-3019697	0.0173043	0.182396	0.116	DecIR
ENSG00000064545	TMEM161A	chr19	-	19121307	19121668	19121307	19121421	19121524	19121668	TMEM161A,chr19:19121422-19121523	0.0330457	0.169634	0.054	DecIR
ENSG00000064545	TMEM161A	chr19	-	19132351	19132754	19132351	19132433	19132656	19132754	TMEM161A,chr19:19132434-19132655	0.0153058	0.266003	0.063	DecIR
ENSG00000278558	TMEM191B	chr22	+	18529605	18530008	18529605	18529724	18529935	18530008	TMEM191B,chr22:18529725-18529934	0.00849395	0.115558	0.208	DecIR
ENSG00000186501	TMEM222	chr1	+	27334150	27336399	27334150	27334281	27335378	27336399	TMEM222,chr1:27334282-27335377	5.78573e-05	0.0045623	0.052	DecIR
ENSG00000160055	TMEM234	chr1	-	32216199	32216947	32216199	32216517	32216888	32216947	TMEM234,chr1:32216518-32216887	0.00652661	0.0976227	0.073	DecIR
ENSG00000149582	TMEM25	chr11	+	118531191	118531871	118531191	118531234	118531777	118531871	TMEM25,chr11:118531235-118531776	0.00548735	0.0870474	0.174	DecIR
ENSG00000177728	TMEM94	chr17	+	75492928	75493593	75492928	75493102	75493490	75493593	TMEM94,chr17:75493103-75493489	0.0173377	0.182405	0.057	DecIR
ENSG00000118503	TNFAIP3	chr6	+	137875687	137876166	137875687	137875835	137875995	137876166	TNFAIP3,chr6:137875836-137875994	9.21219e-08	3.11756e-05	0.073	DecIR
ENSG00000090905	TNRC6A	chr16	+	24805013	24805733	24805013	24805151	24805673	24805733	TNRC6A,chr16:24805152-24805672	0.0150576	0.168172	0.073	DecIR
ENSG00000170919	TPT1-AS1	chr13	+	45378529	45379335	45378529	45378671	45379194	45379335	TPT1-AS1,chr13:45378672-45379193	0.00942624	0.123683	0.056	DecIR
ENSG00000164548	TRA2A	chr7	-	23521706	23522432	23521706	23521840	23522120	23522432	TRA2A,chr7:23521841-23522119	8.34506e-05	0.00601554	0.056	DecIR
ENSG00000089195	TRMT6	chr20	-	5941052	5942036	5941052	5941139	5941950	5942036	TRMT6,chr20:5941140-5941949	4.25717e-07	9.87907e-05	0.082	DecIR
ENSG00000149743	TRPT1	chr11	-	64224800	64225580	64224800	64224970	64225498	64225580	TRPT1,chr11:64224971-64225497	0.00830294	0.113913	0.073	DecIR
ENSG00000182173	TSEN54	chr17	+	75521704	75523335	75521704	75522521	75523274	75523335	TSEN54,chr17:75522522-75523273	6.71998e-06	0.000894748	0.07	DecIR
ENSG00000135452	TSPAN31	chr12	+	57746175	57746720	57746175	57746256	57746592	57746720	TSPAN31,chr12:57746257-57746591	7.89411e-07	0.0001644	0.107	DecIR
ENSG00000214021	TTLL3	chr3	+	9817644	9820741	9817644	9818920	9820545	9820741	TTLL3,chr3:9818921-9820544	0.000128014	0.00770168	0.081	DecIR
ENSG00000077152	UBE2T	chr1	-	202333009	202333335	202333009	202333093	202333236	202333335	UBE2T,chr1:202333094-202333235	0.0165383	0.177442	0.056	DecIR
ENSG00000143258	USP21	chr1	+	161164533	161164942	161164533	161164612	161164834	161164942	USP21,chr1:161164613-161164833	0.00370246	0.0680349	0.061	DecIR
ENSG00000115464	USP34	chr2	-	61236025	61236389	61236025	61236073	61236324	61236389	USP34,chr2:61236074-61236323	0.0134322	0.155408	0.057	DecIR
ENSG00000149823	VPS51	chr11	+	65107186	65107727	65107186	65107372	65107580	65107727	VPS51,chr11:65107373-65107579	0.0115094	0.140782	0.055	DecIR
ENSG00000182484	WASH6P	chrX	+	156022313	156022834	156022313	156022459	156022698	156022834	WASH6P,chrX:156022460-156022697	2.4059e-06	0.00041576	0.165	DecIR
ENSG00000177082	WDR73	chr15	-	84647889	84648625	84647889	84647954	84648536	84648625	WDR73,chr15:84647955-84648535	0.00172239	0.0413883	0.082	DecIR
ENSG00000161996	WDR90	chr16	+	653745	655147	653745	653803	655028	655147	WDR90,chr16:653804-655027	0.0190602	0.191387	0.166	DecIR
ENSG00000161996	WDR90	chr16	+	655057	655468	655057	655147	655306	655468	WDR90,chr16:655148-655305	0.0458264	0.321974	0.132	DecIR
ENSG00000169884	WNT10B	chr12	-	48967945	48968319	48967945	48968006	48968148	48968319	WNT10B,chr12:48968007-48968147	0.00089088	0.0266019	0.073	DecIR
ENSG00000229043	ZFAND2A-DT	chr7	+	1162961	1163495	1162961	1163217	1163451	1163495	ZFAND2A-DT,chr7:1163218-1163450	0.0171205	0.182006	0.12	DecIR
ENSG00000174652	ZNF266	chr19	-	9418761	9419299	9418761	9418895	9419050	9419299	ZNF266,chr19:9418896-9419049	1.56415e-09	1.15491e-06	0.112	DecIR
ENSG00000234420	ZNF37BP	chr10	-	42551989	42552542	42551989	42552280	42552387	42552542	ZNF37BP,chr10:42552281-42552386	0.00276549	0.0560133	0.061	DecIR
ENSG00000167962	ZNF598	chr16	-	1999495	2000481	1999495	2000256	2000390	2000481	ZNF598,chr16:2000257-2000389	0.00411005	0.0725659	0.059	DecIR
ENSG00000122952	ZWINT	chr10	-	56359686	56360383	56359686	56359853	56360017	56360383	ZWINT,chr10:56359854-56360016	0.0359613	0.120408	0.069	DecIR
ENSG00000122952	ZWINT	chr10	-	56360017	56360383	56360017	56360141	56360292	56360383	ZWINT,chr10:56360142-56360291	0.00907287	0.278243	0.081	DecIR
